# Supplementary material
Source: Springer Nature journal article supplement (https://www.springermedizin.de/resource/supplementary/12955_2010_804_MOESM3_ESM.pdf/9561282)

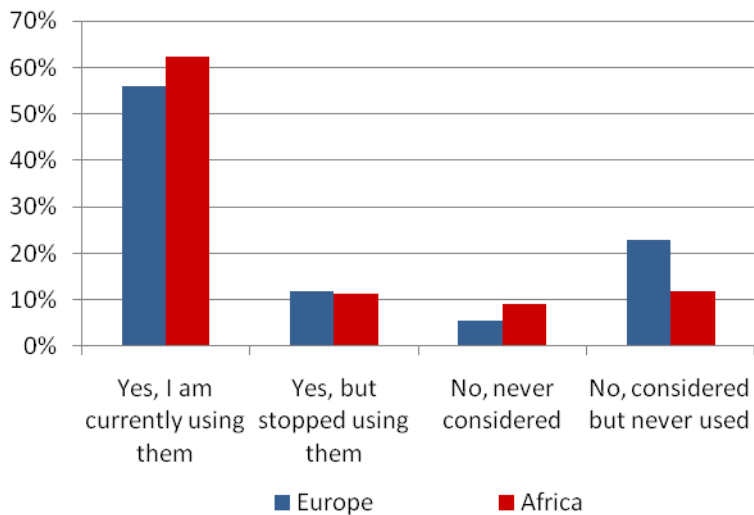

Supplement: MOESM3 [file 9561282]
